# Supplementary material for: Improved representation of phosphorus exchange on soil mineral surfaces reduces estimates of P limitation in temperate forest ecosystems
Source: Copernicus journal article supplement (doi:10.5194/bg-2022-114), 2022-05-31
Supplement: Supplementary file 1 [file bg-2022-114-supplement.pdf]

# Supplementary material for “Improved representation of phosphorus exchange on soil mineral surfaces reduces estimates of P limitation in temperate forest ecosystems”

Lin Yu<sup>1,2</sup>, Silvia Caldararu<sup>2</sup>, Bernhard Ahrens<sup>2</sup>, Thomas Wutzler<sup>2</sup>, Marion Schrumpf<sup>2,3</sup>, Julian Helfenstein<sup>4</sup>, Chiara Pistocchi<sup>5</sup>, and Sönke Zaehle<sup>2</sup>

<sup>1</sup>Centre for Environmental and Climate Science, Lund University, Sölvegatan 37223 62 Lund, Sweden

<sup>2</sup>Max Planck Institute for Biogeochemistry, Hans-Knoell-Str. 10, Jena, 07745, Germany

<sup>3</sup>International Max Planck Research School (IMPRS) for Global Biogeochemical Cycles, Jena, 07745, Germany

<sup>4</sup>Agroscope, Reckenholzstrasse 191, 8046 Zürich, Switzerland

<sup>5</sup>Eco&Sols, Institut Agro, CIRAD, INRA, IRD, Place Viala 34060 Montpellier cedex 2, France

Correspondence to: Lin Yu (lin.yu@cec.lu.se)

## S1 Additional figures and tables

**Table S1: The normalized root mean square ratio ( $K_{rmsr}$ ) between simulated and observed soil properties along soil profiles of four models at five study sites (Fig. 2).**

| Soil properties | Site | 4pool | siLang | dbLang | Control |
|-----------------|------|-------|--------|--------|---------|
| SOC             | BBR  | 0.32  | 0.32   | 0.32   | 0.32    |
|                 | MTF  | 0.59  | 0.58   | 0.59   | 0.59    |
|                 | VES  | 0.56  | 0.54   | 0.56   | 0.56    |
|                 | COM  | 0.47  | 0.49   | 0.47   | 0.47    |
|                 | LUE  | 0.59  | 0.58   | 0.63   | 0.61    |
| SOM CN ratio    | BBR  | 0.9   | 0.90   | 0.90   | 0.90    |
|                 | MTF  | 0.95  | 0.95   | 0.95   | 0.95    |
|                 | VES  | 0.93  | 0.93   | 0.93   | 0.93    |
|                 | COM  | 0.85  | 0.84   | 0.85   | 0.85    |
|                 | LUE  | 0.84  | 0.84   | 0.85   | 0.86    |
| SOM CP ratio    | BBR  | 0.54  | 0.54   | 0.54   | 0.54    |
|                 | MTF  | 0.58  | 0.58   | 0.58   | 0.58    |
|                 | VES  | 0.74  | 0.74   | 0.74   | 0.74    |
|                 | COM  | 0.76  | 0.73   | 0.76   | 0.76    |
|                 | LUE  | 0.61  | 0.61   | 0.63   | 0.67    |
| Bulk density    | BBR  | 0.69  | 0.69   | 0.69   | 0.69    |

|                              |     |      |      |      |      |
|------------------------------|-----|------|------|------|------|
|                              | MTF | 0.76 | 0.76 | 0.76 | 0.76 |
|                              | VES | 0.79 | 0.79 | 0.79 | 0.79 |
|                              | COM | 0.66 | 0.61 | 0.66 | 0.66 |
|                              | LUE | 0.81 | 0.81 | 0.82 | 0.84 |
| <b>SOP</b>                   | BBR | 0.33 | 0.33 | 0.33 | 0.33 |
|                              | MTF | 0.39 | 0.40 | 0.39 | 0.40 |
|                              | VES | 0.46 | 0.46 | 0.46 | 0.46 |
|                              | COM | 0.49 | 0.52 | 0.49 | 0.49 |
|                              | LUE | 0.49 | 0.50 | 0.45 | 0.42 |
| <b>SIP</b>                   | BBR | 0.77 | 0.78 | 0.77 | 0.79 |
|                              | MTF | 0.85 | 0.78 | 0.85 | 0.81 |
|                              | VES | 0.78 | 0.72 | 0.81 | 0.78 |
|                              | COM | 0.76 | 0.68 | 0.80 | 0.82 |
|                              | LUE | 0.81 | 0.81 | 0.81 | 0.77 |
| <b>Labile Pi</b>             | BBR | 0.26 | 0.48 | 0.57 | 0.74 |
|                              | MTF | 0.29 | 0.47 | 0.68 | 0.71 |
|                              | VES | 0.3  | 0.51 | 0.60 | 0.56 |
|                              | COM | 0.18 | 0.37 | 0.36 | 0.76 |
|                              | LUE | 0.28 | 0.65 | 0.41 | 0.68 |
| <b>Sorbed Pi</b>             | BBR | NA   | 0.69 | 0.56 | 0.82 |
|                              | MTF | NA   | 0.62 | 0.71 | 0.79 |
|                              | VES | NA   | 0.55 | 0.78 | 0.72 |
|                              | COM | NA   | 0.39 | 0.63 | 0.82 |
|                              | LUE | NA   | 0.34 | 0.40 | 0.71 |
| <b>Lab-to-Exchangeable P</b> | BBR | NA   | 0.47 | 0.62 | 0.80 |
|                              | MTF | NA   | 0.46 | 0.70 | 0.67 |
|                              | VES | NA   | 0.54 | 0.71 | 0.47 |
|                              | COM | NA   | 0.35 | 0.37 | 0.72 |
|                              | LUE | NA   | 0.55 | 0.62 | 0.61 |

**Table S2 Parameters for sensitivity analysis**

| Symbol                    | Description                 | Value | Unit                      | Reference        |
|---------------------------|-----------------------------|-------|---------------------------|------------------|
| $v_{max,PO_4}$            | Maximum plant P uptake rate | 0.044 | $\mu\text{mol P/mol C/s}$ | Thum et al. 2019 |
| $\chi_{SOM_{fast}}^{N:P}$ | N:P ratio of fast SOM pool  | 31    | mol/mol                   | Thum et al. 2019 |

|                           |                                                                            |         |                                        |                  |
|---------------------------|----------------------------------------------------------------------------|---------|----------------------------------------|------------------|
| $\chi_{SOM_{slow}^{N:P}}$ | N:P ratio of slow SOM pool                                                 | 11.07   | mol/mol                                | Thum et al. 2019 |
| $\mu_P$                   | Microbial phosphorus-use efficiency                                        | 0.8     | mol/mol                                | Thum et al. 2019 |
| $\tau_{fast}$             | Turnover time of fast SOM pool                                             | 2       | years                                  | Thum et al. 2019 |
| $\tau_{slow}$             | Turnover time of slow SOM pool                                             | 100     | years                                  | Thum et al. 2019 |
| $\tau_{biomin}$           | Phosphorus biomineralization turnover time                                 | 5       | years                                  | Thum et al. 2019 |
| $k_{weath}$               | Weathering rate constant of mineral soil                                   | 8.16208 | $10^{-8} \mu\text{mol P/m}^3/\text{s}$ | Yang et al. 2014 |
| $k_{ocl}$                 | Occlusion coefficient of sorbed $\text{PO}_4$                              | 3.86    | $10^{-13} \text{s}^{-1}$               | Yang et al. 2014 |
| $k_{ads}$                 | $\text{PO}_4$ (ab)sorption rate from $\text{P}_{lab}$ to $\text{P}_{sorb}$ | 651.852 | $\mu\text{mol P/kg soil/s}$            | Yang et al. 2014 |
| $k_{des}$                 | $\text{PO}_4$ desorption rate from $\text{P}_{sorb}$ to $\text{P}_{lab}$   | 733     | $\mu\text{mol P/kg soil/s}$            | Yang et al. 2014 |
| $K_{m,PO_4}^{pH}$         | Correction coefficient of pH on Langmuir $K_m$                             | 0.4     | –                                      | this study       |
| $Q_{max,PO_4}^{Al/Fe}$    | Phosphate sorption capacity of Al/Fe oxides                                | 9.134   | mmol P/kg clay                         | this study       |
| $Q_{max,PO_4}^{fs}$       | Phosphate sorption capacity of fine soil                                   | 9.134   | mmol P/kg fine soil                    | this study       |
| $Q_{max,PO_4}^{sand}$     | Phosphate sorption capacity of sand                                        | 4.567   | mmol P/kg sand                         | this study       |
| $Q_{max,PO_4}^{OM}$       | Phosphate sorption capacity of organic matter                              | 4.567   | mmol P/kg OM                           | this study       |

**Table S3. The weighted mean values of partial correlation coefficient against all the output variables (Fig. 5) for the 16 selected parameters (Table S2) in the LHS sensitivity runs. Overall importance of parameters is measured by first calculating the RPCC for each output variable and then calculating the mean of the absolute RPCC values across selected outputs in Fig.5, weighted by the uncertainty contribution of these model outputs**

| Models, sites & Parameters | dbLang |      | siLang |      |
|----------------------------|--------|------|--------|------|
|                            | COM    | MTF  | COM    | MTF  |
| $\tau_{slow}$              | 0.89   | 0.97 | 0.82   | 0.78 |
| $\tau_{fast}$              | 0.55   | 0.61 | 0.34   | 0.35 |
| $\chi_{SOM_{slow}^{N:P}}$  | 0.63   | 0.34 | 0.62   | 0.32 |

|                        |      |      |      |      |
|------------------------|------|------|------|------|
| $k_{des}$              | 0.03 | 0.03 | 0.61 | 0.54 |
| $k_{ads}$              | 0.02 | 0.02 | 0.90 | 0.86 |
| $v_{max,PO_4}$         | 0.31 | 0.17 | 0.50 | 0.39 |
| $x_{SOM_{fast}^{N:P}}$ | 0.28 | 0.22 | 0.26 | 0.26 |
| $Q_{max,PO_4}^{sand}$  | 0.14 | 0.16 | 0.21 | 0.19 |
| $Q_{max,PO_4}^{fs}$    | 0.20 | 0.26 | 0.56 | 0.28 |
| $Q_{max,PO_4}^{Al/Fe}$ | 0.32 | 0.32 | 0.05 | 0.18 |
| $Q_{max,PO_4}^{OM}$    | 0.14 | 0.12 | 0.10 | 0.18 |
| $K_{m,PO_4}^{pH}$      | 0.24 | 0.23 | 0.21 | 0.14 |
| $k_{weath}$            | 0.25 | 0.13 | 0.31 | 0.10 |
| $\tau_{biomin}$        | 0.03 | 0.02 | 0.02 | 0.01 |
| $k_{ocl}$              | 0.04 | 0.04 | 0.03 | 0.03 |
| $\mu_P$                | 0.02 | 0.01 | 0.01 | 0.01 |

**Figure S1: Reported Smax, Km, and Ptot in batch experiment data. The plot is produced based on 258 data inputs from [1-27]. The processing details are given in Section “A1 Processing of the reviewed data”.**

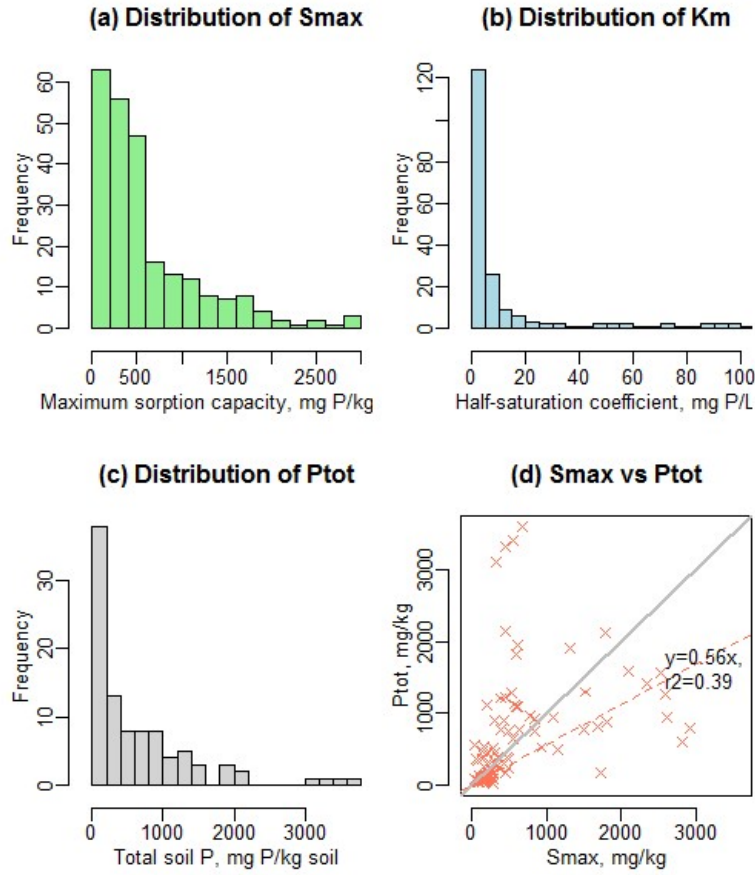

Figure S2: Figure 4 Simulated GPP, LAI, aboveground C, fine root C, plant uptakes of N and P

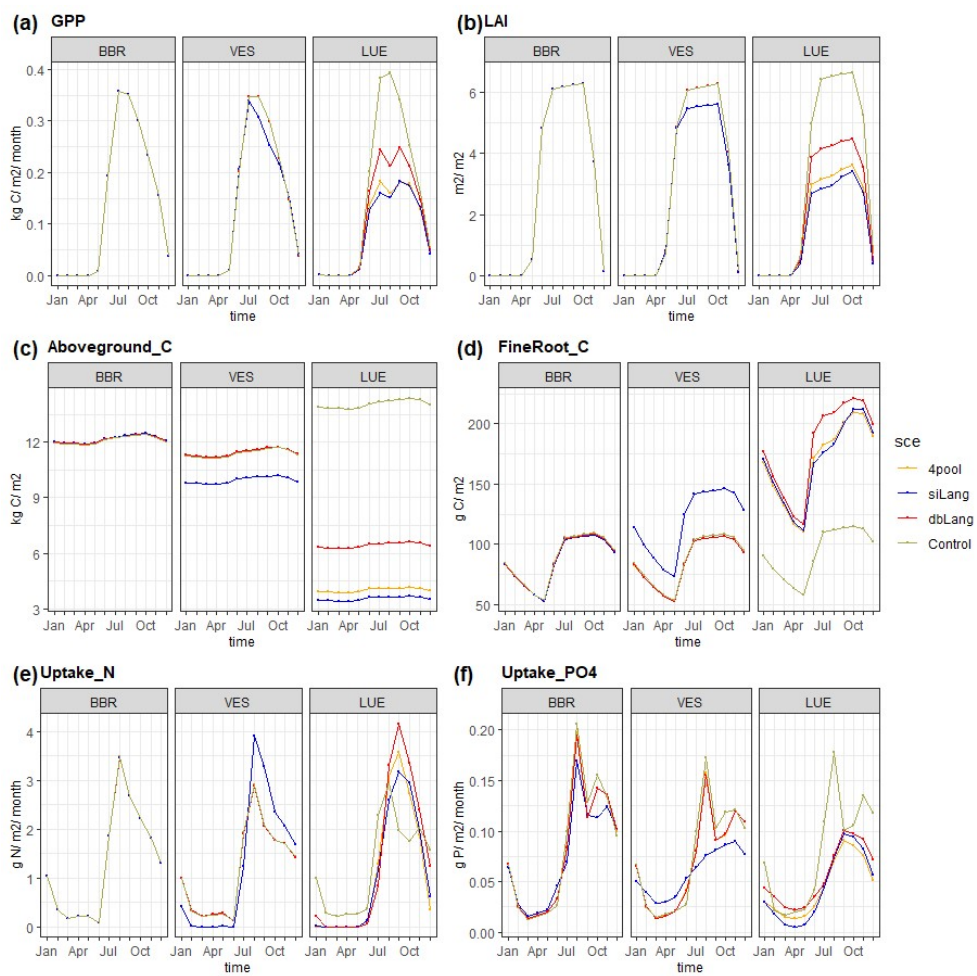

Figure S3: 4pool model responses to C and P fertilisation

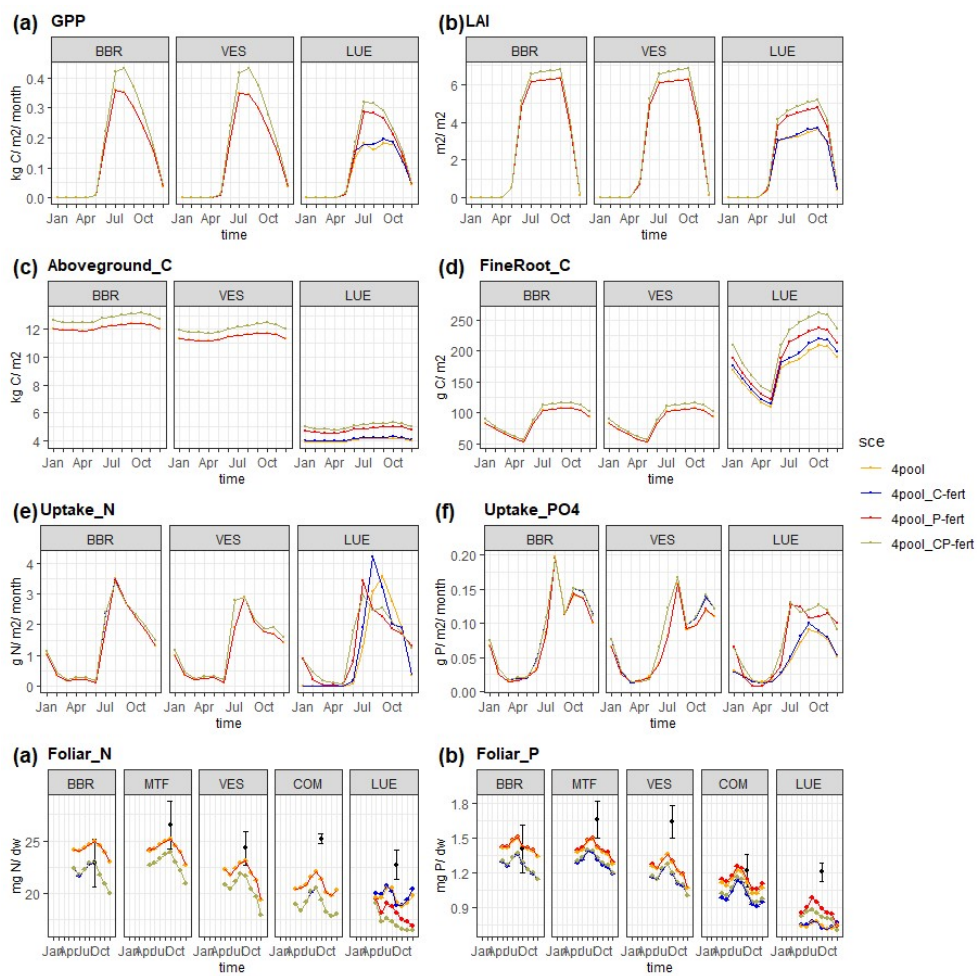

Figure S4: dbLang model responses to C and P fertilization

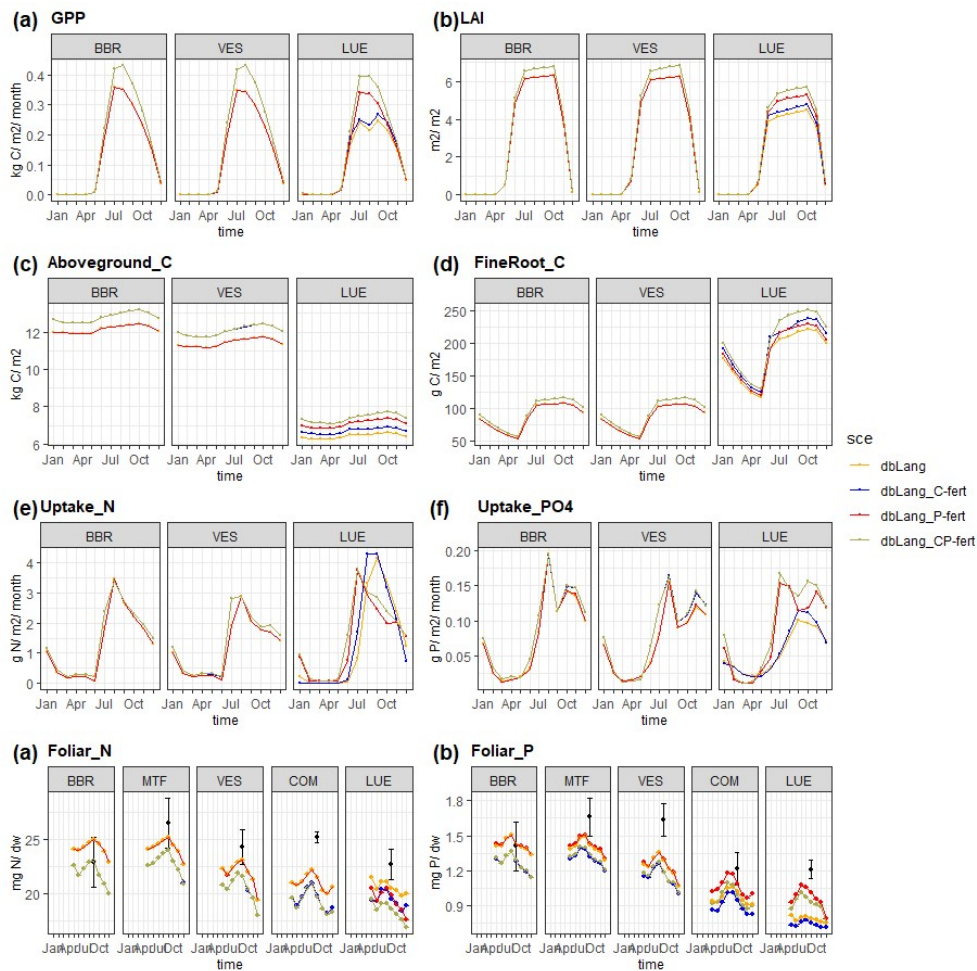



Figure S5: siLang model responses to C and P fertilization

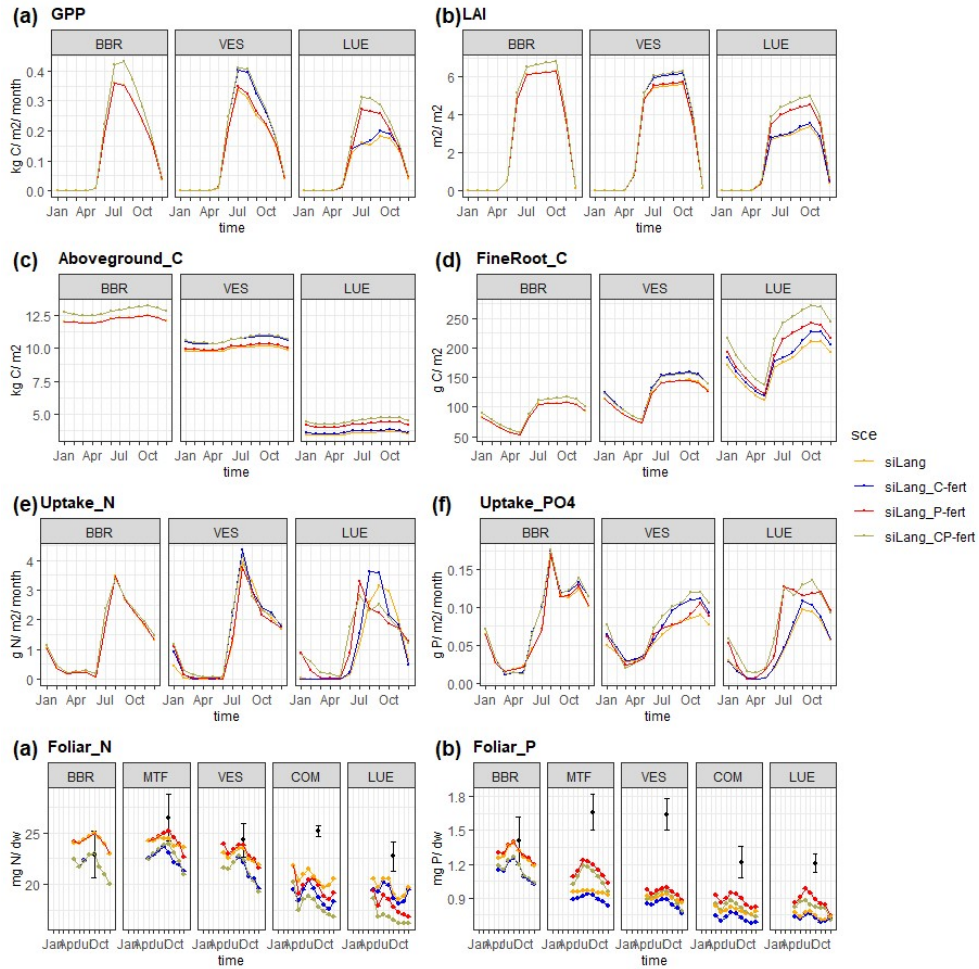

**Figure S6: Normalized output variations in the LHS sensitivity analysis of siLang and dbLang models at COM and MTF sites. The selected output variables include GPP (kg C/m<sup>2</sup>/yr), foliar N content (mg N/g d.w.), foliar P content (mg P/g d.w.), plant C (kg C/m<sup>2</sup>), SOC stock (kg C/m<sup>2</sup>), SOP and SIP stocks (g P/m<sup>2</sup>) and Lab-to-Exchangeable P ratio. All the calculations are performed based on data from the last 10 years of 1000 LHS simulations, and soil variables are based on the topmost 1m of soil. The numbers below bars are the mean values of the 1000 LHS runs, and bars are the distribution of all 1000 LHS runs normalized to the mean value.**

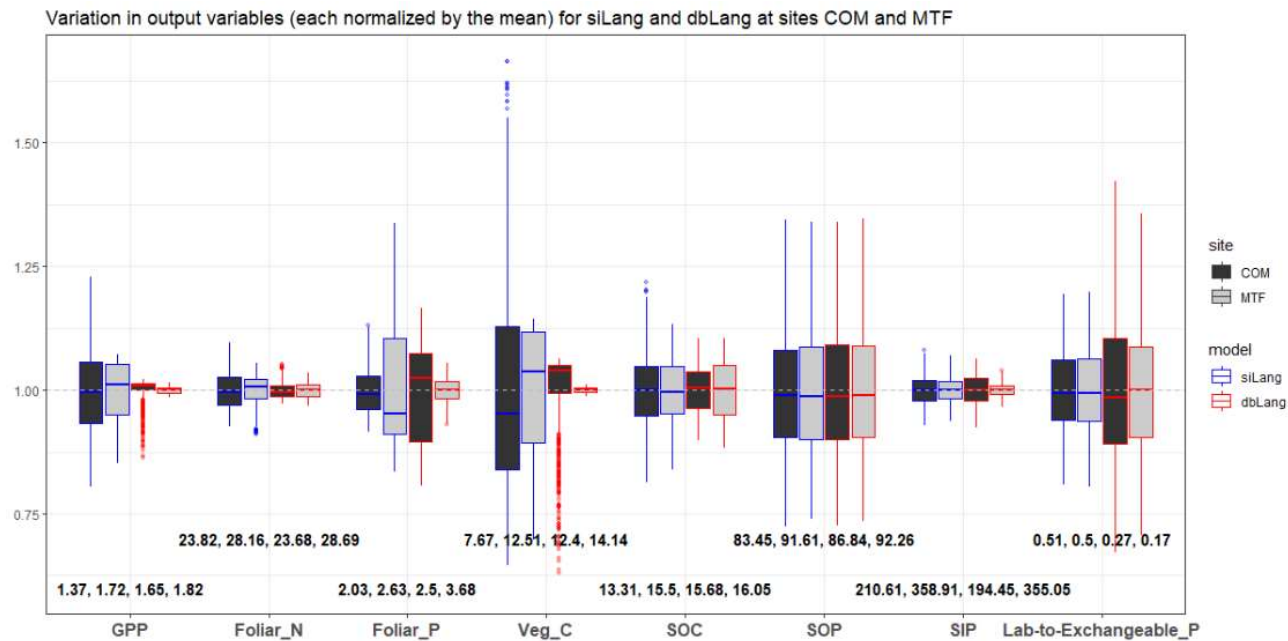

The simulated annual GPP was lower in **siLang** ( $1.37 \pm 0.12$  and  $1.72 \pm 0.12$  kg C/m<sup>2</sup>/yr for COM and MTF) than in **dbLang** ( $1.65 \pm 0.04$  and  $1.82 \pm 0.01$  kg C/m<sup>2</sup>/yr for COM and MTF), and **siLang** responded more strongly to changes of P cycling processes parameterization than **dbLang** (Figs. 5 and S6), reflecting a stronger P-control on plant productivity in the **siLang** model. This stronger P limitation also led to lower plant and soil C in **siLang** (plant C:  $7.67 \pm 1.58$  and  $12.51 \pm 1.55$  kg C/m<sup>2</sup> for COM and MTF; soil C:  $13.31 \pm 0.94$  and  $15.50 \pm 0.96$  kg C/m<sup>2</sup> for COM and MTF) than in **dbLang** (plant C:  $12.40 \pm 1.06$  and  $14.14 \pm 0.07$  kg C/m<sup>2</sup> for COM and MTF; soil C:  $15.78 \pm 0.76$  and  $16.04 \pm 0.95$  kg C/m<sup>2</sup> for COM and MTF).

**Figure S7: Responses of Labile-to-Active P fraction to changes in parameterization in siLang and dbLang models at COM and MTF sites**

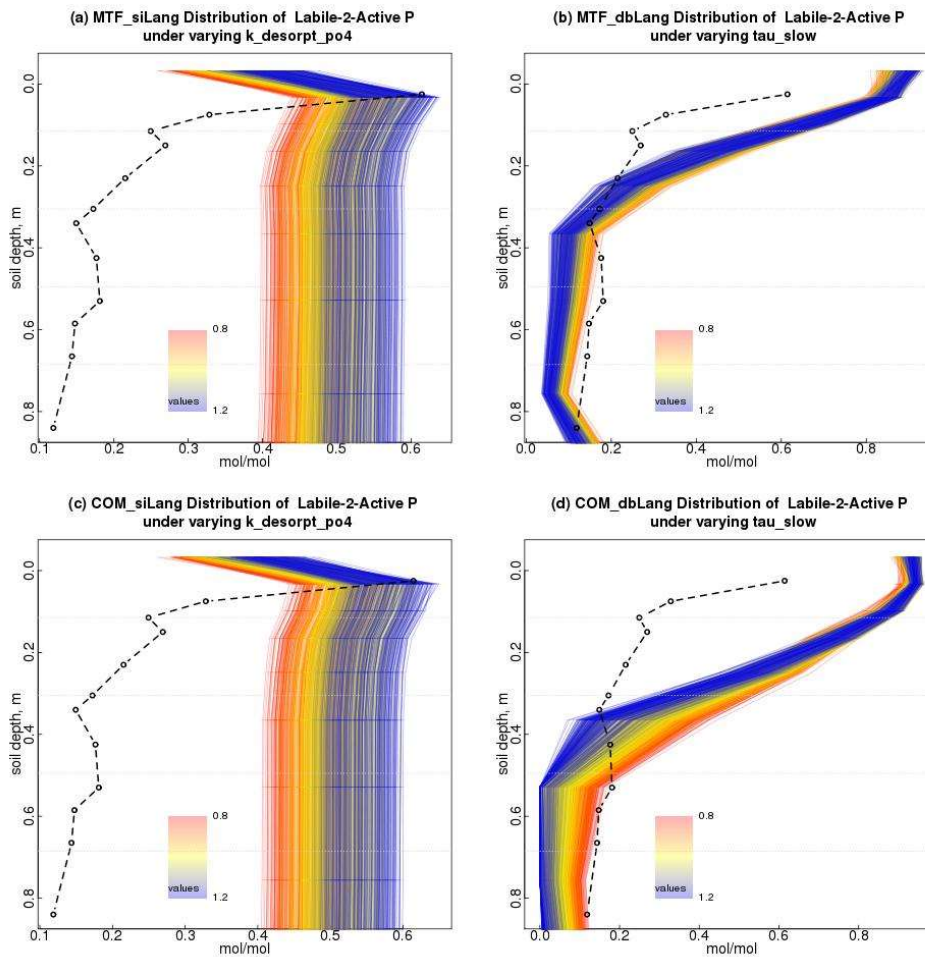

## 5 S2 Processing of the reviewed data

As most P species present in soil solution are negatively charged, the major P sorbents are those constituents that bear positive charges. These include hydroxyl (Fe and Al oxides), carboxyl (organic matter) or silanol (clays) groups [28]. Of the studies that we reviewed, the P sorption capacity of soils has been variously related to soil pH [18, 23, 29], mineralogy or clay content [30-32], organic complexes of Fe and Al [33], soil organic matter such as DOC, organic acids, DOP etc. [29, 34-37], calcium carbonate [8, 26], soil pedogenesis [32, 35], extractable Fe and Al oxides, hydroxides, and oxyhydroxides, and other soil properties. The correlation between soil properties and Langmuir parameters are demonstrated in the figure below,

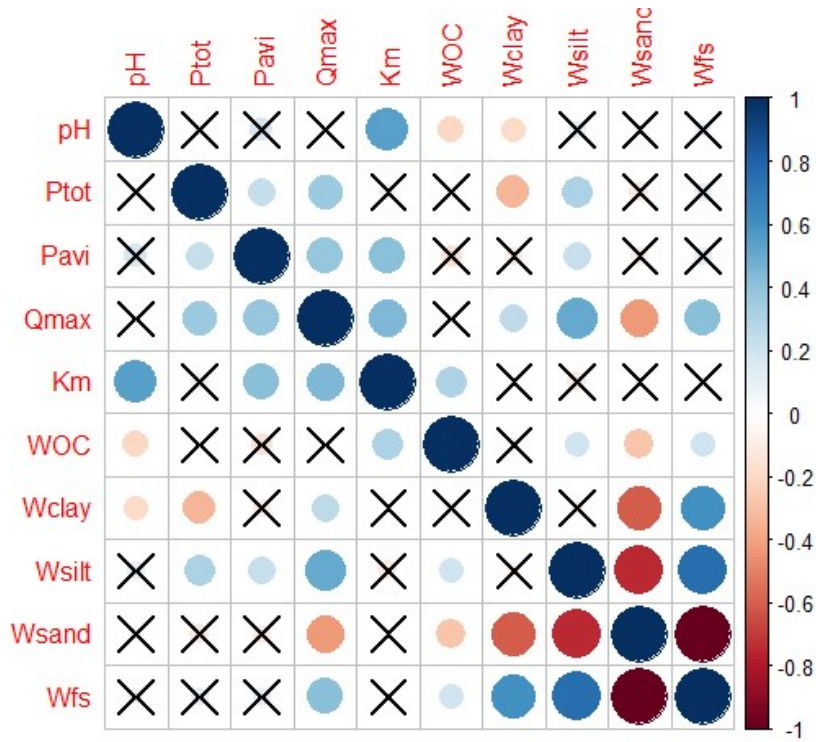

**Figure S8: Correlation between reported soil properties and Langmuir parameters from reviewed literature. More details given below.**

- 15 To derive Figs. S1 and S8, the raw data from reference [1-27] were processed in the following steps:
  1. Conversion of Langmuir coefficient from  $K_L$  to  $K_m$ . The Langmuir isotherm in the batch sorption experiments were reporting the Langmuir coefficient either as  $K_L$  in the unit of L/mg P, or as  $K_m$  in the unit of mg P/L. We unified the Langmuir coefficient to  $K_m$  by inverting  $1/K_L$ . To further generate the data for Table 1 and Fig. 2, we assumed that the soil water content for all experiments data are 330 L/m<sup>3</sup> soil and converted the unit from mg P/L to g P/m<sup>2</sup>.
  - 20 2. Selection of reported soil properties. The reviewed papers don't follow the same protocols in reporting the soil properties, apart from the two Langmuir isotherm parameters ( $S_{max}$  and  $K_m$ ), many studies also reported organic matter contents (OM, in percent), soil texture (clay, silt and sand), pH (measured in water or CaCl<sub>2</sub>/KCl), total soil P (Ptot, mg P/ kg soil), available P (Pavi, mg P/kg soil). We selected the abovementioned variables (pH as water measured values) to understand their relationships with Langmuir parameters.
- 25 Conversion of OM and soil texture to weights. In order to derive a weight-based relationship between Langmuir parameters, the reported OM contents and soil texture were converted to OM and clay, silt, sand weights, assuming an OM density of 250 kg/m<sup>3</sup> and mineral soil bulk density of 1000 kg/m<sup>3</sup>. The correlation between the soil properties and Langmuir parameters are plotted in Fig. S7, where WOC, Wclay, Wsilt, Wsand are the OM, clay, silt, and sand weights [kg/m<sup>3</sup>], respectively, and Wfs stands for weight of fine soil (clay plus silt).

### 30 S3 Double-surface Langmuir isotherm and parametrization

As both single- and double-surface Langmuir isotherm could be fitted against the same experiments data, the apparent maximum sorption capacity ( $S_{max}$ ) in Eq. 1 is the sum of sorption maxima of two sorption sites ( $S_{max,1}$  and  $S_{max,2}$ , Eqs. 3.1 and 3.2) and the apparent Langmuir coefficient ( $K_m$ ) in Eq. 1 could be derived mathematically from the Langmuir coefficients of two sorption sites ( $K_{m,1}$  and  $K_{m,2}$ , Eqs. 3.4 and 3.5).

35 Following the concept of double-surface Langmuir isotherm, we assume that the apparent maximum sorption capacity and Langmuir coefficient in all the batch sorption experiment are in fact a combined value of two (or more) sorption surfaces.

$$S = S_{max} \frac{P_{sol}}{K_m + P_{sol}} = S_{max,1} \frac{P_{sol}}{K_{m,1} + P_{sol}} + S_{max,2} \frac{P_{sol}}{K_{m,2} + P_{sol}}, \quad (S1)$$

Where the apparent maximum sorption capacity is the sum of sorption maxima of individual sorption surface,

$$S_{max} = S_{max,1} + S_{max,2} \quad (S2)$$

40 The apparent Langmuir coefficient is calculated in Eq.3d which is derived using the differential form of double-surface Langmuir isotherm,

$$\frac{dS}{dt} = \frac{S_{max}K_m}{(K_m + P_{sol})^2} \frac{dP_{sol}}{dt} = \frac{S_{max,1}K_{m,1}}{(K_{m,1} + P_{sol})^2} \frac{dP_{sol}}{dt} + \frac{S_{max,2}K_{m,2}}{(K_{m,2} + P_{sol})^2} \frac{dP_{sol}}{dt}, \text{ thus} \quad (S3)$$

$$K_m = \frac{\frac{S_{max}}{hlp} - 2P_{sol} \pm \sqrt{\frac{S_{max}^2}{hl^2} - 4 \frac{S_{max}P_{sol}}{hlp}}}{2}, \text{ where} \quad (S3.1)$$

$$hlp = \frac{S_{max,1}K_{m,1}}{(K_{m,1} + P_{lab})^2} + \frac{S_{max,2}K_{m,2}}{(K_{m,2} + P_{lab})^2} \quad (S3.2)$$

45 To estimate the sorption maximum and Langmuir coefficient of each sorption surface, we derived pedo-functions based on the reported soil properties from the batch sorption experiment data. As shown in Fig.S2, the maximum sorption capacity is positively correlated with clay and silt content, negatively correlated with sand content and does not show correlation with OM content; the Langmuir coefficient is strongly correlated with soil pH and OM content and not correlated with soil texture. Given the high uncertainty in the original experiment data, and the lack of extractable Al and Fe content that represent  
50 crystalline and non-crystalline Fe and Al oxides and organic complexes of Fe and Al, which are commonly considered the main sorbents of P, we tested different combination of soil sorbents and finally used a four sorbents pedo-functions for  $S_{max}$  and  $K_m$ ,

$$S_{max} = S_{max,1} + S_{max,2} \quad (\text{Equation S2})$$

$$S_{max,1} = Q_{max,PO_4}^{Al/Fe} \cdot W_{clay} \cdot f_{Al/Fe} + Q_{max,PO_4}^{OM} \cdot W_{OM} \quad (\text{Equation S4.1})$$

$$55 \quad S_{max,2} = Q_{max,PO_4}^{fs} \cdot W_{clay+silt} \cdot f_{Al/Fe} + Q_{max,PO_4}^{sand} \cdot W_{sand} \quad (\text{Equation S4.2})$$

$$f_{Al/Fe} = \frac{(Fe_{ox} + Al_{ox})}{10mmol/kg} \quad (\text{Equation S4.3})$$

$$K_{m,1} = k_{ph} \cdot pH \cdot f(K_m^{OM}, K_m^{Al/Fe}) \quad (\text{Equation S4.4})$$

$$K_{m,2} = k_{ph} \cdot pH \cdot f(K_m^{fs}, K_m^{sand}) \quad (\text{Equation S4.5})$$

Where  $Q_{max,PO_4}^{Al/Fe}$  is the sorption capacity of crystalline and non-crystalline Fe and Al oxides normalized by the clay content;  $f_{Al/Fe}$  is the correction coefficient of oxalate-extractable Al and Fe, which is calculated in Eq. 4.3, assuming that most Al- & Fe- (hydro)oxides reside in clay and the rest in silt;  $k_{ph}$  is a unitless correction factor to account for the effect of pH, and  $K_{m,l}$  and  $K_{m,2}$  are calculated using Eqs.4.4 and 4.5.

**Table S4: Parameters for double-surface Langmuir isotherm**

| Symbol                 | Description                                   | Value   | Unit                |
|------------------------|-----------------------------------------------|---------|---------------------|
| $K_{m,PO_4}^{pH}$      | Correction coefficient of pH on Langmuir Km   | 0.4     | –                   |
| $Q_{max,PO_4}^{Al/Fe}$ | Phosphate sorption capacity of Al/Fe oxides   | 9.134   | mmol P/kg clay      |
| $Q_{max,PO_4}^{fs}$    | Phosphate sorption capacity of fine soil      | 9.134   | mmol P/kg fine soil |
| $Q_{max,PO_4}^{sand}$  | Phosphate sorption capacity of sand           | 4.567   | mmol P/kg sand      |
| $Q_{max,PO_4}^{OM}$    | Phosphate sorption capacity of organic matter | 4.567   | mmol P/kg OM        |
| $K_m^{Al/Fe}$          | Langmuir coefficient of Al/Fe oxides          | 315.445 | μmol P/L            |
| $K_m^{fs}$             | Langmuir coefficient of fine soil             | 2.176   | mmol P/L            |
| $K_m^{OM}$             | Langmuir coefficient of soil organic matter   | 20      | mmol P/L            |
| $K_m^{sand}$           | Langmuir coefficient of sand                  | 20      | mmol P/L            |

#### 65 S4 Deep soil inorganic P initialization

The initial inorganic P pools of soils deeper than 1m was calculated using the following equations:

$$P_{primary}^{frac} = \min\left(\frac{2*\sqrt{z}, 3.4}{3.5}\right) \quad (\text{Equation S5.1})$$

$$P_{exchangabl}^{frac} = \frac{0.8^{2*z}}{3.5} \quad (\text{Equation S5.2})$$

$$P_{ocl}^{frac} = \max\left(1 - P_{primary}^{frac} - P_{exchangabl}^{frac}, \frac{0.1}{3.5}\right) \quad (\text{Equation S5.3})$$

70 Where  $z$  is the soil depth in m, and  $P_{exchangeable}$  includes  $P_{sorb}$  and  $P_{lab}$  with a constant ratio of 9/8 at all depths. The total soil inorganic P contents for all the study sites (g P/m<sup>3</sup>, >1m depth) are given in Table S5.

| depth (m) | BBR   | MTF  | VES  | COM  | LUE |
|-----------|-------|------|------|------|-----|
| 1.14      | 124.1 | 12.9 | 31.0 | 18.8 | 7.6 |

|      |       |      |      |      |     |
|------|-------|------|------|------|-----|
| 1.58 | 133.9 | 15.0 | 32.8 | 18.3 | 5.8 |
| 2.20 | 100.0 | 16.7 | 40.7 | 23.4 | 5.9 |
| 3.06 | 126.0 | 16.9 | 41.9 | 25.0 | 6.8 |
| 4.27 | 122.2 | 17.5 | 41.1 | 21.1 | 8.3 |
| 5.95 | 145.0 | 15.1 | 48.4 | 21.9 | 8.4 |
| 8.22 | 90.0  | 15.6 | 54.0 | 15.1 | 8.5 |

**Table S5: The total soil inorganic P contents (g P/m<sup>3</sup>, >1m depth) for all study sites at specific depth at QUINCY initialization. The initial values of soil inorganic P contents at top 1 m soil were prescribed from the Hedley fractionation measurements.**

75

1. Abekoe, M.K. and K.L. Sahrawat, *Phosphate retention and extractability in soils of the humid zone in West Africa*. Geoderma, 2001. **102**(1-2): p. 175-187.
2. Ahmed, M.F., et al., *Phosphorus adsorption in some Australian soils and influence of bacteria on the desorption of phosphorus*. Communications in Soil Science and Plant Analysis, 2008. **39**(9-10): p. 1269-1294.
- 80 3. Chakraborty, D., V.D. Nair, and W.G. Harris, *Compositional Differences Between Alaquods and Paleudults Affecting Phosphorus Sorption-Desorption Behavior*. Soil Science, 2012. **177**(3): p. 188-197.
4. Debicka, M., et al., *Organic matter effects on phosphorus sorption in sandy soils*. Archives of Agronomy and Soil Science, 2015. **62**(6): p. 840-855.
5. Dossa, E.L., et al., *Phosphorus Sorption and Desorption in Semiarid Soils of Senegal Amended With Native Shrub*
- 85 *Residues*. Soil Science, 2008. **173**(10): p. 669-682.
6. Fan, H., et al., *Effects of freeze-thaw cycles on phosphorus adsorption and desorption in the black soil of northeastern China*. Acta Agriculturae Scandinavica, Section B — Soil & Plant Science, 2014. **64**(1): p. 24-32.
7. Guedes, R.S., et al., *Adsorption and desorption kinetics and phosphorus hysteresis in highly weathered soil by stirred flow chamber experiments*. Soil and Tillage Research, 2016. **162**: p. 46-54.
- 90 8. Harrell, D.L. and J.J. Wang, *Fractionation and Sorption of Inorganic Phosphorus in Louisiana Calcareous Soils*. Soil Science, 2006. **171**(1): p. 39-51.
9. Hartono, A., S. Funakawa, and T. Kosaki, *Phosphorus sorption-desorption characteristics of selected acid upland soils in Indonesia*. Soil Science and Plant Nutrition, 2005. **51**(6): p. 787-799.
10. Holford, i.C.R., r.W.M. Wedderburn, and g.E.G. Mattingly, *A langmuir two-surface equation as a model for*
- 95 *phosphate adsorption by soils*. Journal of Soil Science, 1974. **25**(2): p. 242-255.
11. Horta, C., et al., *Phosphorus sorption and desorption properties of soils developed on basic rocks under a subhumid Mediterranean climate*. Soil Use and Management, 2013. **29**: p. 15-23.
12. Huang, Q., W. Liang, and P. Cai, *Adsorption, desorption and activities of acid phosphatase on various colloidal particles from an Ultisol*. Colloids and surfaces B: Biointerfaces, 2005. **45**(3-4): p. 209-214.

- 100 13. Janardhanan, L. and S.H. Daroub, *Phosphorus Sorption in Organic Soils in South Florida*. Soil Science Society of America Journal, 2010. **74**(5): p. 1597-1597.
14. Kolahchi, Z. and M. Jalali, *Phosphorus Movement and Retention by Two Calcareous Soils*. Soil and Sediment Contamination: An International Journal, 2013. **22**(1): p. 21-38.
15. Pal, S.K., *Phosphorus sorption-desorption characteristics of soils under different land use patterns of eastern India*. Archives of Agronomy and Soil Science, 2011. **57**(4): p. 365-376.
- 105 16. Sakadevan, K. and H.J. Bavor, *Phosphate adsorption characteristics of soils, slags and zeolite to be used as substrates in constructed wetland systems*. Water Research, 1998. **32**(2): p. 393-399.
17. Sanyal, S.K., P.Y. Chan, and S.K. De Datta, *Phosphate Sorption-Desorption Behavior of Some Acidic Soils of South and Southeast Asia*. Soil Science Society of America Journal, 1993. **57**(4): p. 937-937.
- 110 18. Sato, S. and N.B. Comerford, *Influence of soil pH on inorganic phosphorus sorption and desorption in a humid Brazilian Ultisol*. Revista Brasileira de Ciencia do Solo, 2005. **29**(5): p. 685-694.
19. Shirvani, M., et al., *Land-Use Conversion Effects on Phosphate Sorption Characteristics in Soils of Forest and Rangeland Sites from Zagros Area, Western Iran*. Arid Land Research and Management, 2010. **24**(919557984): p. 223-237.
20. Singh, B.R., et al., *Phosphorus fractionation and sorption in P-enriched soils of Norway*. Nutrient Cycling in Agroecosystems, 2005. **73**(2-3): p. 245-256.
- 115 21. Singh, V., N.S. Dhillon, and B.S. Brar, *Influence of long-term use of fertilizers and farmyard manure on the adsorption-desorption behaviour and bioavailability of phosphorus in soils*. Nutrient Cycling in Agroecosystems, 2006. **75**(1-3): p. 67-78.
22. Villapando, R.R. and D.a. Graetz, *Phosphorus Sorption and Desorption Properties of the Spodic Horizon from Selected Florida Spodosols*. Soil Science Society of America Journal, 2001. **65**(2): p. 331-331.
- 120 23. Wisawapipat, W., et al., *Phosphate sorption and desorption by Thai upland soils*. Geoderma, 2009. **153**(3-4): p. 408-415.
24. Xu, D., et al., *Studies on the phosphorus sorption capacity of substrates used in constructed wetland systems*. Chemosphere, 2006. **63**(2): p. 344-352.
- 125 25. Zafar, M., et al., *Phosphorus seasonal sorption-desorption kinetics in suspended sediment in response to land use and management in the Guapore catchment, Southern Brazil*. Environ Monit Assess, 2016. **188**(11): p. 643.
26. Zhou, M. and Y. Li, *Phosphorus-Sorption Characteristics of Calcareous Soils and Limestone from the Southern Everglades and Adjacent Farmlands*. Soil Science Society of America Journal, 2001. **65**(5): p. 1404-1404.
27. Zou, P., J. Fu, and Z. Cao, *Chronosequence of paddy soils and phosphorus sorption-desorption properties*. Journal of Soils and Sediments, 2011. **11**(2): p. 249-259.
- 130 28. Hinsinger, P., *Bioavailability of soil inorganic P in the rhizosphere as effected by root-induced chemical changes: A review*. Plant and Soil, 2001. **237**: p. 173-195.



29. Giesler, R., et al., *Phosphate Sorption in Aluminum- and Iron-Rich Humus Soils*. Soil Science Society of America Journal, 2005. **69**: p. 77-86.
- 135 30. Penn, C.J., G.L. Mullins, and L.W. Zelazny, *Mineralogy in Relation to Phosphorus Sorption and Dissolved Phosphorus Losses in Runoff*. Soil Science Society of America Journal, 2005. **69**(5): p. 1532-1532.
31. Barros, N.F., et al., *Phosphorus sorption, desorption and resorption by soils of the Brazilian Cerrado supporting eucalypt*. Biomass and Bioenergy, 2005. **28**(2): p. 229-236.
32. Lair, G.J., et al., *Phosphorus sorption-desorption in alluvial soils of a young weathering sequence at the Danube*  
140 *River*. Geoderma, 2009. **149**(1-2): p. 39-44.
33. Borggaard, O.K., et al., *Influence of humic substances on phosphate adsorption by aluminium and iron oxides*. Geoderma, 2005. **127**(3-4 SPEC. ISS.): p. 270-279.
34. D'Angelo, E.M., *Phosphorus sorption capacity and exchange by soils from mitigated and late successional bottomland forest wetlands*. Wetlands, 2005. **25**(2): p. 297-305.
- 145 35. Lilienfein, J., et al., *Adsorption of dissolved organic and inorganic phosphorus in soils of a weathering chronosequence*. Soil Science Society of America Journal, 2004. **68**(2): p. 620-620.
36. Schreeg, L.A., M.C. Mack, and B.L. Turner, *Leaf litter inputs decrease phosphate sorption in a strongly weathered tropical soil over two time scales*. Biogeochemistry, 2013. **113**(1-3): p. 507-524.
37. Afif, E., V. Barrón, and J. Torrent, *Organic matter delays but does not prevent phosphate sorption by cerrado soils*  
150 *from Brazil*. Soil Science, 1995. **159**(3): p. 207-211.
